# Supplementary material for: Electrochemical sensing platform for hydrogen peroxide using amorphous FeNiPtnanostructures
Source: Royal Society of Chemistry journal article supplement (doi:10.1039/b9ay00209j), 2009-12-04
Supplement: b9ay00209j.pdf [file b9ay00209j.pdf]

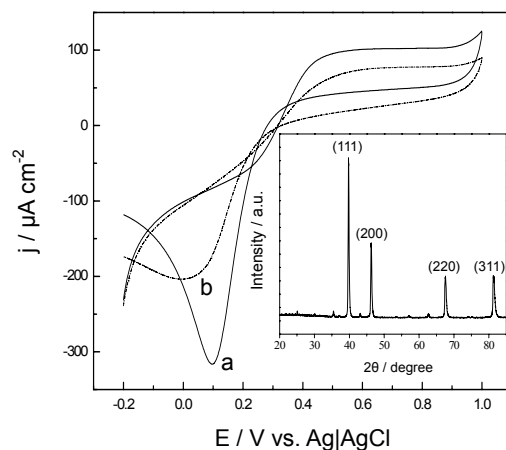

**Fig. S1.** CVs obtained at (a) FeNiPt-NRL/GC and (b) annealed FeNiPt-NRL/GC electrodes in 0.1 M PBS solution containing 1 mM H<sub>2</sub>O<sub>2</sub>. Potential scan rate: 20 mV s<sup>-1</sup>. The inset shows the X-ray diffraction patterns of annealed FeNiPt-NRL.

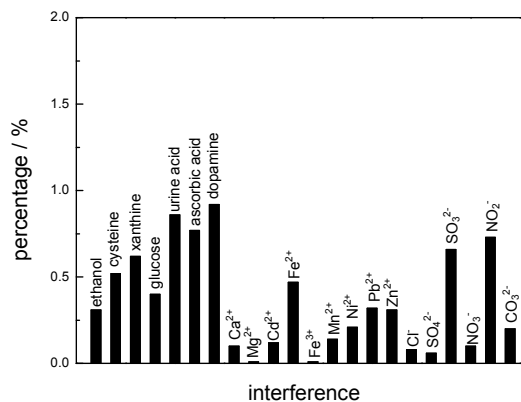

**Fig. S2.** In vitro responses of the FeNiPt-NRL/GC for a variety of potential interferences (50 μM). Expressed as a percentage of the cathodic current of H<sub>2</sub>O<sub>2</sub> (50 μM) in PBS.
